# Supplementary material for: Organic solvent-assisted synthesis of the K3SiF7:Mn4+red phosphor with improved morphology and stability
Source: Royal Society of Chemistry journal article supplement (doi:10.1039/c9tc04670d), 2019-01-01
Supplement: c9tc04670d1.pdf [file c9tc04670d1.pdf]

## Supporting Information

# Organic Solvent-Assisted Synthesis of $\text{K}_3\text{SiF}_7:\text{Mn}^{4+}$ Red Phosphor with Improved Morphology and Stability

Minhee Noh,<sup>a</sup> Dae Ho Yoon,<sup>b</sup> Chang Hae Kim<sup>\*,a</sup> and Seon Joo Lee<sup>\*,a</sup>

<sup>a</sup>Advanced Materials Division, Korea Research Institute of Chemical Technology, 141  
Gajeong-ro, Yuseong-gu, Daejeon 34114, Republic of Korea

<sup>b</sup>School of Advanced Materials Science & Engineering, Sungkyunkwan University,  
Suwon 16419, Republic of Korea

\*Corresponding authors. E-mail: changhae@kriict.re.kr, sjlee614@kriict.re.kr

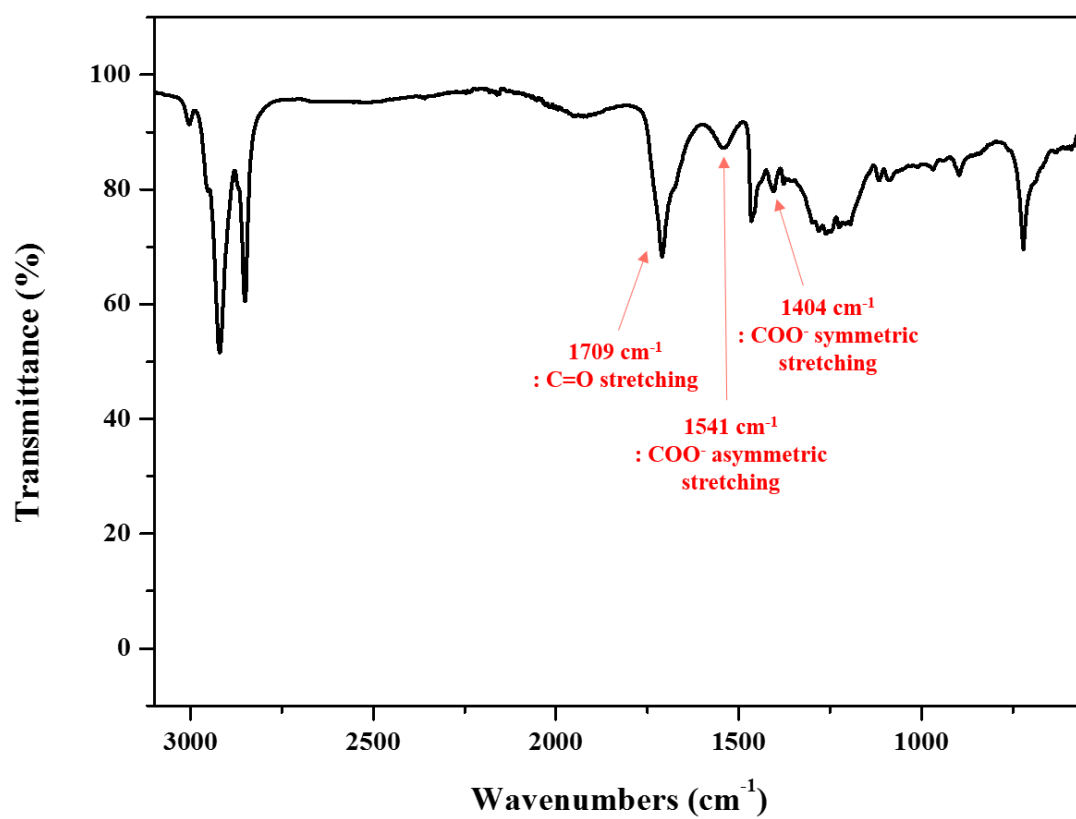

**Figure S1.** IR spectrum of KHF<sub>2</sub> in oleic acid after heating at 225°C for 2h.

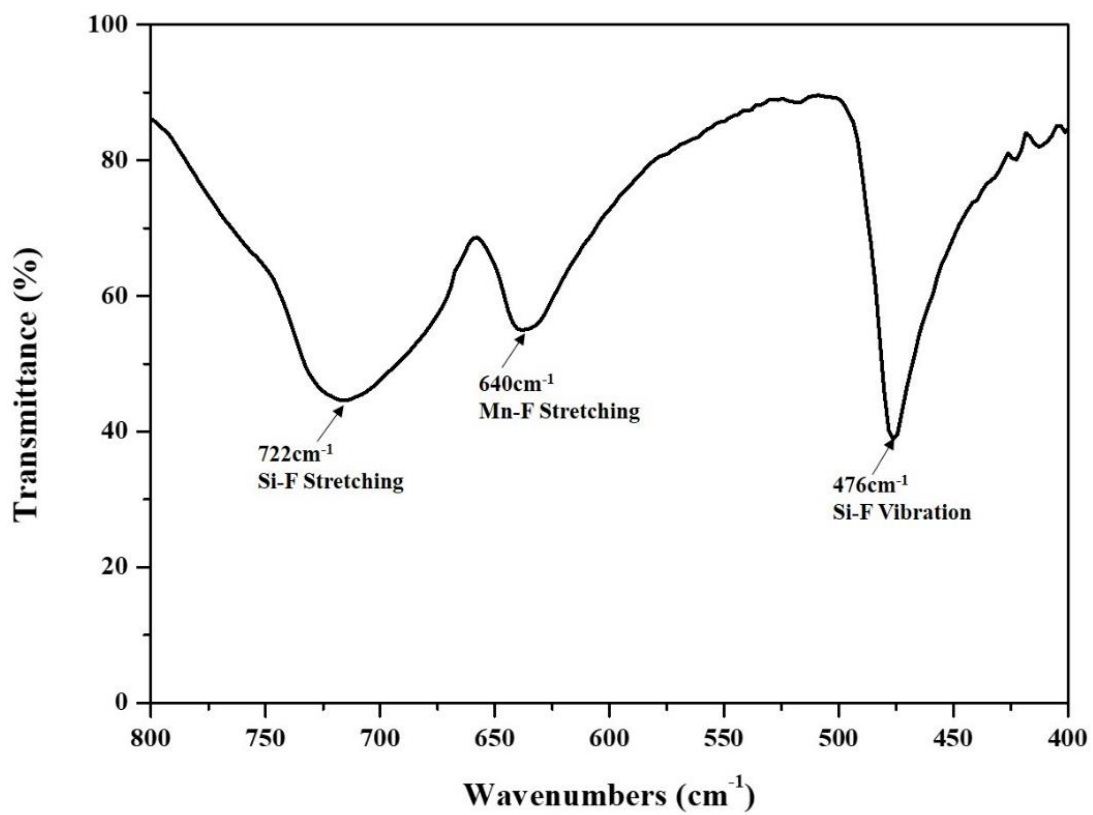

**Figure S2.** IR spectrum of  $K_2SiF_6:Mn^{4+}$  phosphor.

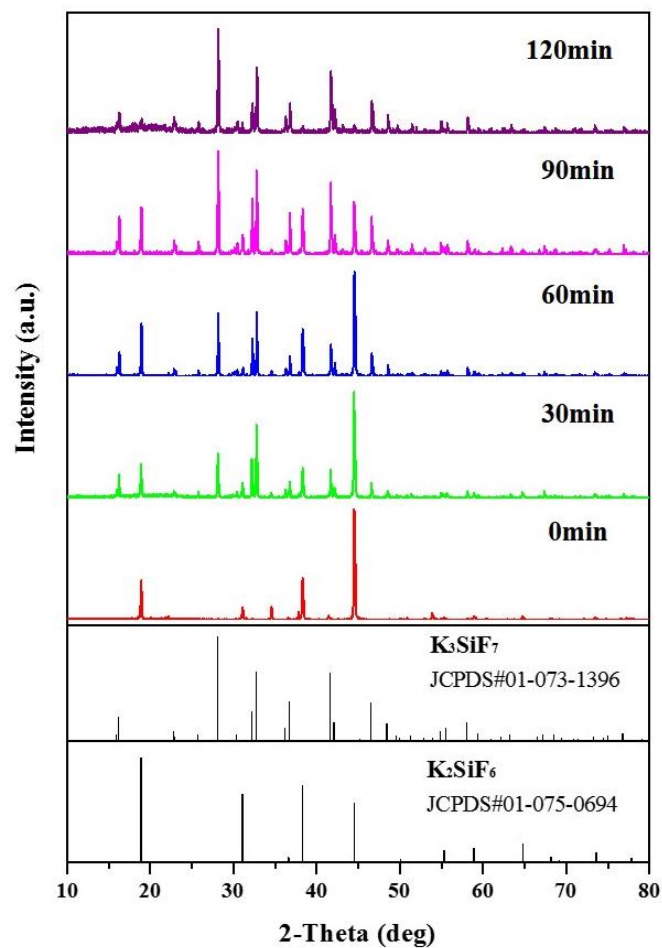

**Figure S3.** XRD patterns of  $\text{K}_3\text{SiF}_7:\text{Mn}^{4+}$  synthesized using oleylamine with reaction time.

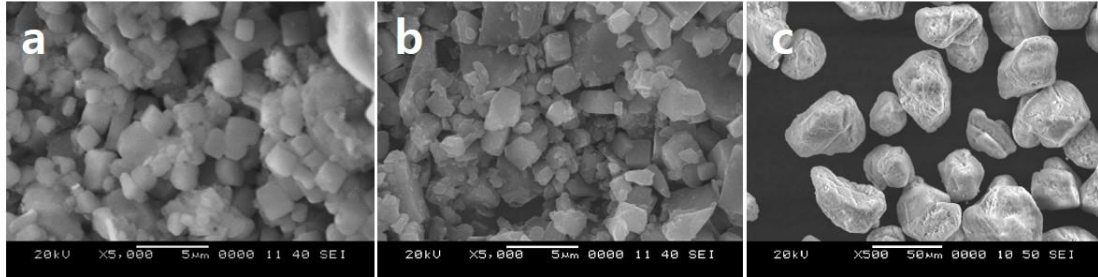

**Figure S4.** SEM image of  $\text{K}_3\text{SiF}_7:\text{Mn}^{4+}$  synthesized through (a,b) organic solvent-assisted synthesis and (c) the solid-state reaction (SSR). (a) is for trioctylphosphine oxide (TOPO) and (b) is for oleylamine.

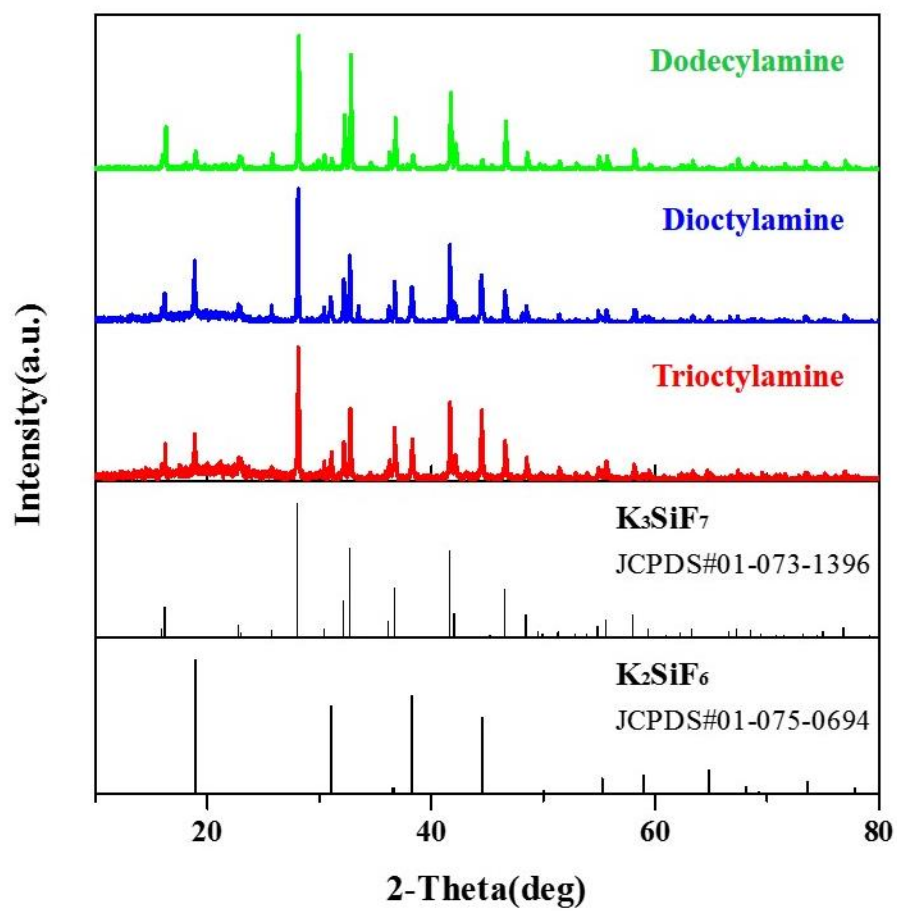

**Figure S5.** XRD patterns of  $\text{K}_3\text{SiF}_7:\text{Mn}^{4+}$  synthesized using various amines.

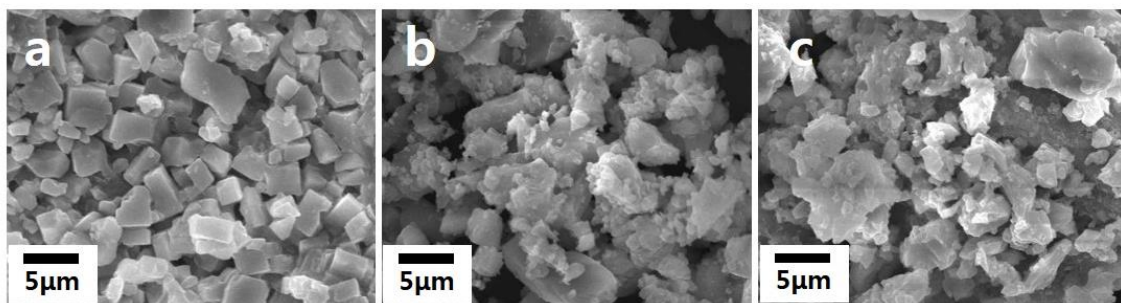

**Figure S6.** SEM images of  $\text{K}_3\text{SiF}_7:\text{Mn}^{4+}$  synthesized using (a) dodecylamine, (b) dioctylamine, and (c) trioctylamine.

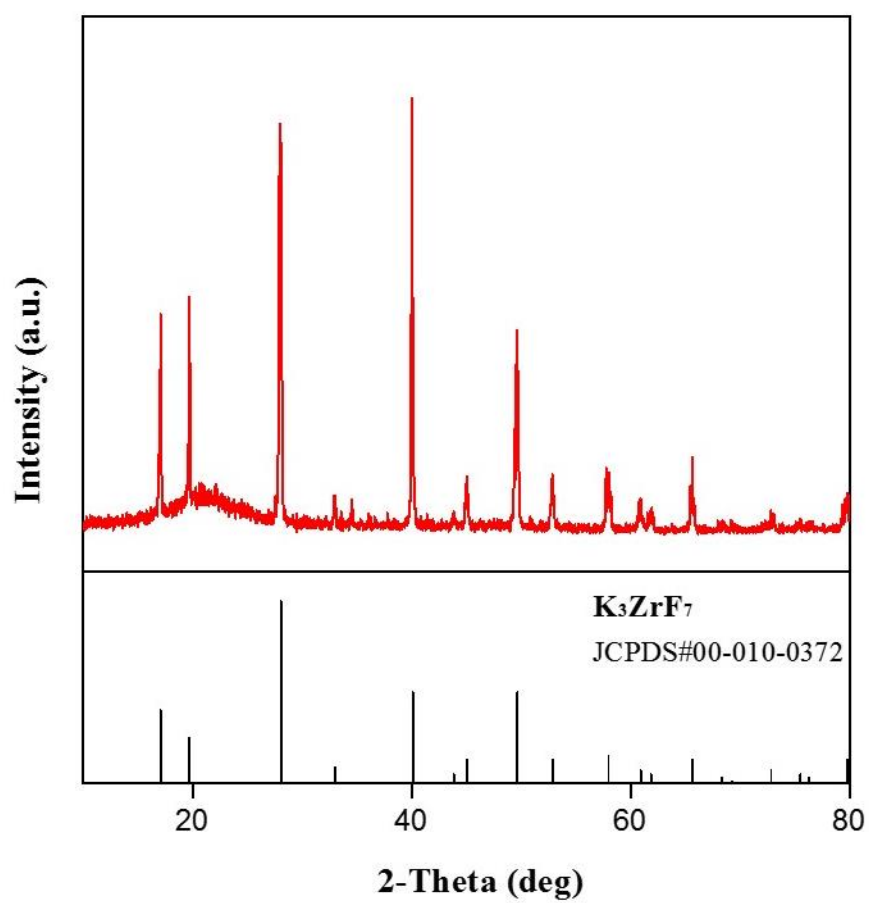

**Figure S7.** XRD pattern of  $\text{K}_3\text{ZrF}_7:\text{Mn}^{4+}$  synthesized using oleylamine.



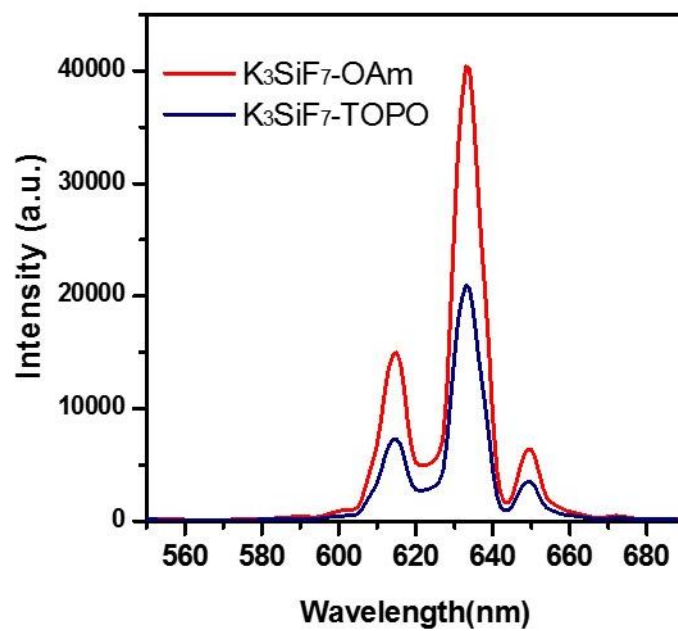

**Figure S8.** The emission spectra of  $K_3SiF_7:Mn^{4+}$  phosphor synthesized using oleylamine (red line) and trioctylphosphine oxide (TOPO) (blue line).

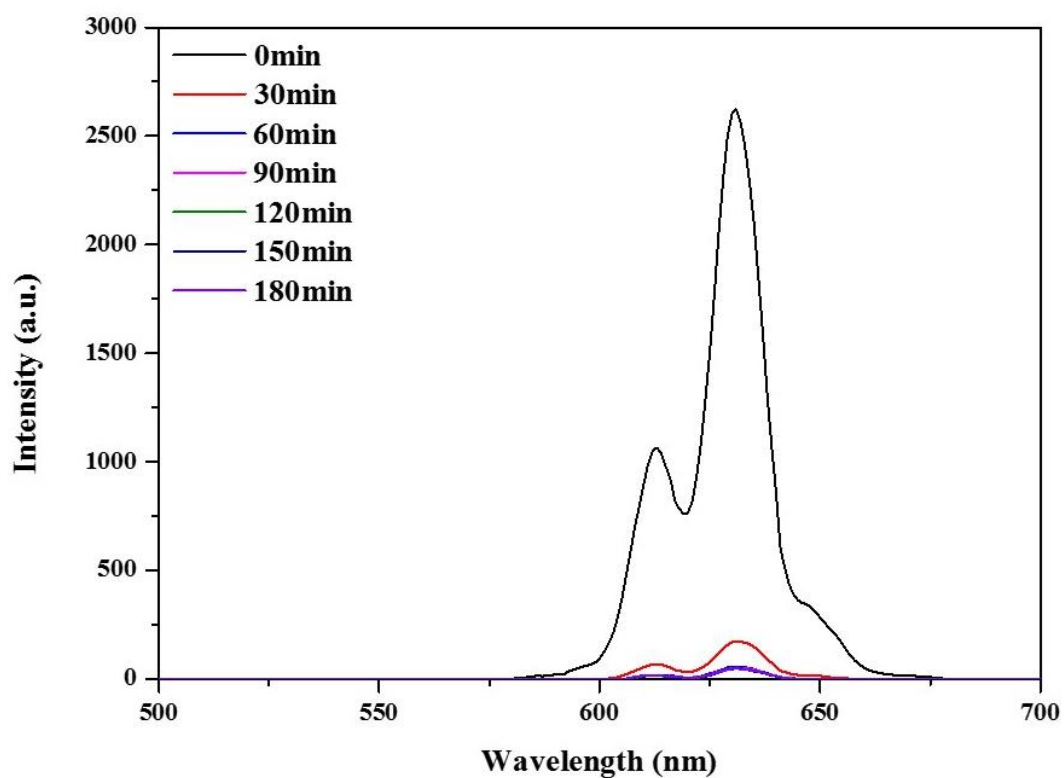

**Figure S9.** PL spectra of  $K_3SiF_7:Mn^{4+}$  phosphor synthesized through the solid state reaction (SSR) with exposure time at high temperature (85 °C) and high humidity (85%) HTHH conditions.

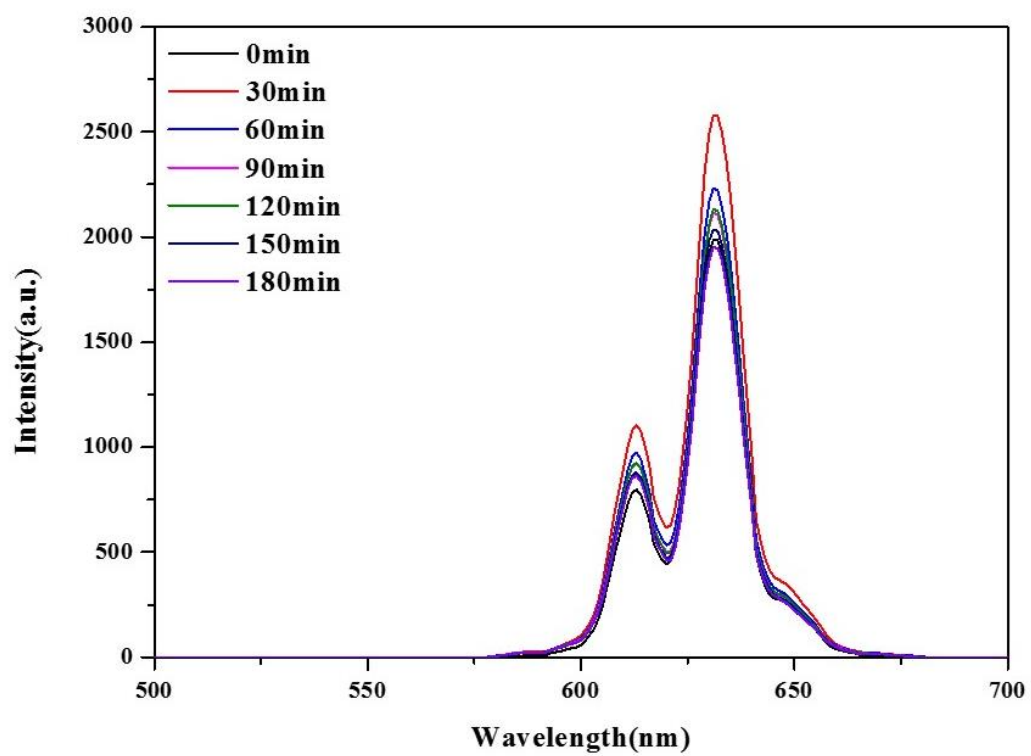

**Figure S10.** PL spectra of  $K_3SiF_7:Mn^{4+}$  phosphor synthesized using oleylamine with exposure time at high temperature (85 °C) and high humidity (85%) HTHH conditions.

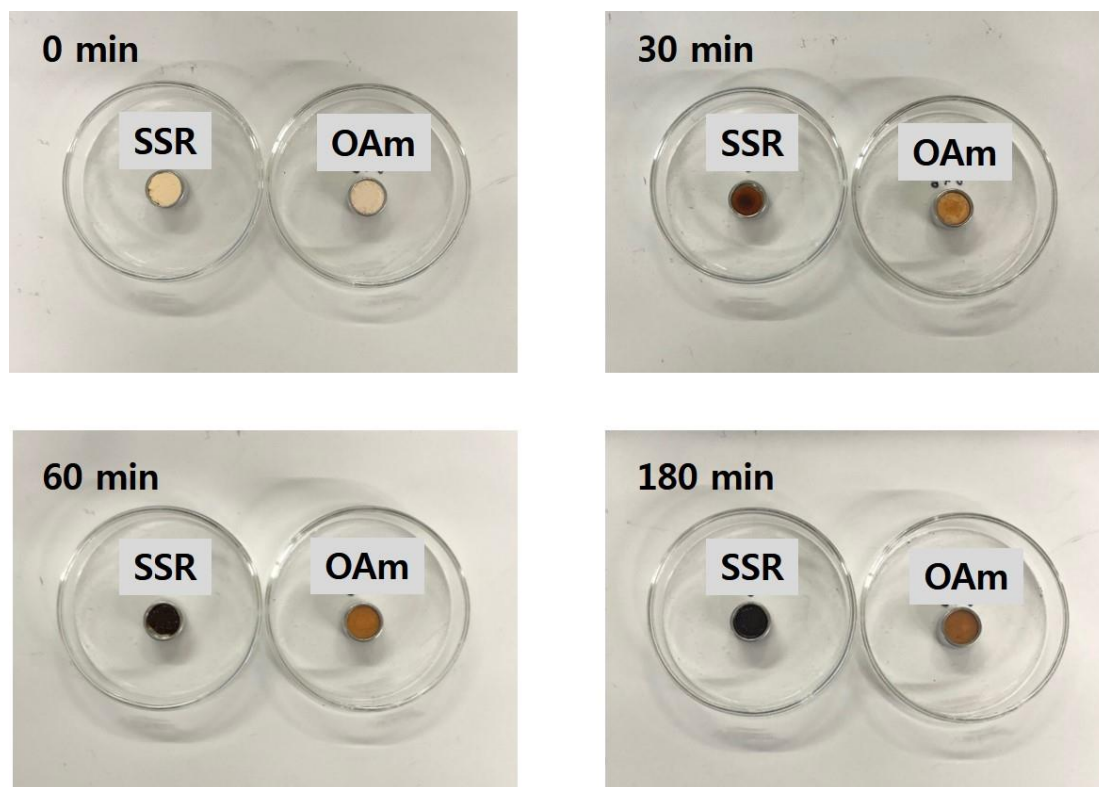

**Figure S11.** Pictures of  $\text{K}_3\text{SiF}_7:\text{Mn}^{4+}$  phosphors after exposure to high temperature (85 °C) and high humidity (85%) HTHH conditions.

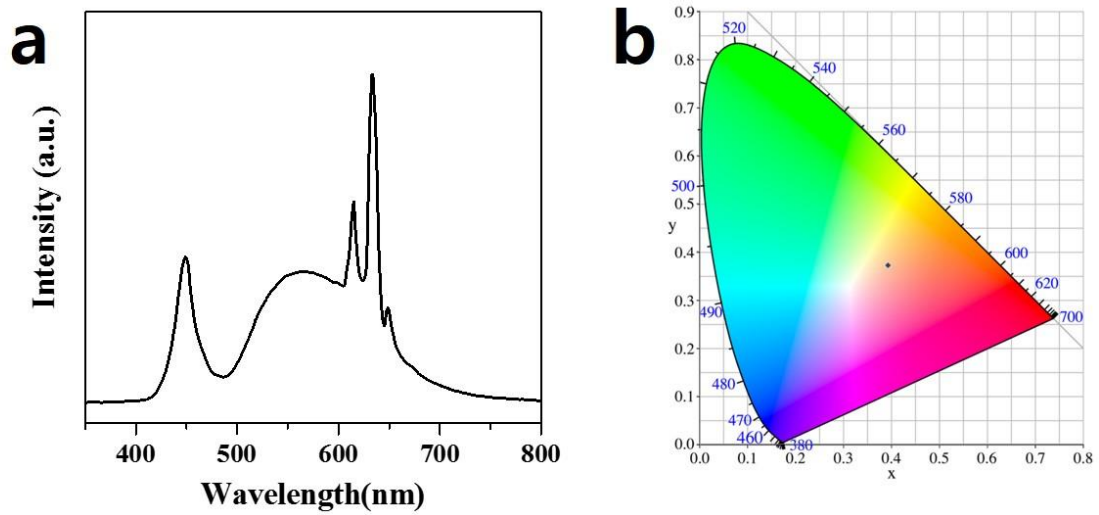

**Figure S12.** (a) Electroluminescence spectrum of ternary WLED device based on  $\text{K}_3\text{SiF}_7:\text{Mn}^{4+}$  and  $\text{Y}_3\text{Al}_5\text{O}_{12}:\text{Ce}^{3+}$  phosphors under a 60 mA current excitation. (b) The chromaticity coordinates of ternary WLED device based on  $\text{K}_3\text{SiF}_7:\text{Mn}^{4+}$  and  $\text{Y}_3\text{Al}_5\text{O}_{12}:\text{Ce}^{3+}$  phosphors and NTSC.
